# Supplementary material for: Domain nucleation kinetics and polarization-texture-dependent electronic properties in two-dimensional α-In2Se3 ferroelectrics
Source: Royal Society of Chemistry journal article supplement (doi:10.1039/d3nr03166g), 2023-01-01
Supplement: d3nr03166g1.pdf [file d3nr03166g1.pdf]

*Supporting Information for*

**Domain-structure-dependent electronic properties and carrier spatial distribution in two-dimensional  $\alpha$ -In<sub>2</sub>Se<sub>3</sub> ferroelectrics**

*Yanan Lu<sup>1</sup>, Liqin Su<sup>1</sup>, Linghui Fang<sup>1</sup>, Qingyuan Luo<sup>1</sup>, Meiyong Gong<sup>1</sup>, Dan Cao<sup>2</sup>,  
Xiaoshuang Chen<sup>3</sup>, Xiaowen Shi<sup>4</sup>, Haibo Shu<sup>1,\*</sup>*

*<sup>1</sup>College of Optical and Electronic Technology, China Jiliang University, Hangzhou  
310018, People's Republic of China*

*<sup>2</sup>College of Science, China Jiliang University, Hangzhou 310018, People's Republic of  
China*

*<sup>3</sup>State Key Laboratory of Infrared Physics, Shanghai Institute of Technical Physics,  
Chinese Academy of Science, Shanghai 200083, People's Republic of China*

*<sup>4</sup>Hongzhiwei Technology (Shanghai) Co., Ltd., Shanghai 201206, People's Republic of  
China*

\*Corresponding author. E-mail: shuhaibo@cjlu.edu.cn, Phone: 86-0571-86875622

## S1. Computational models

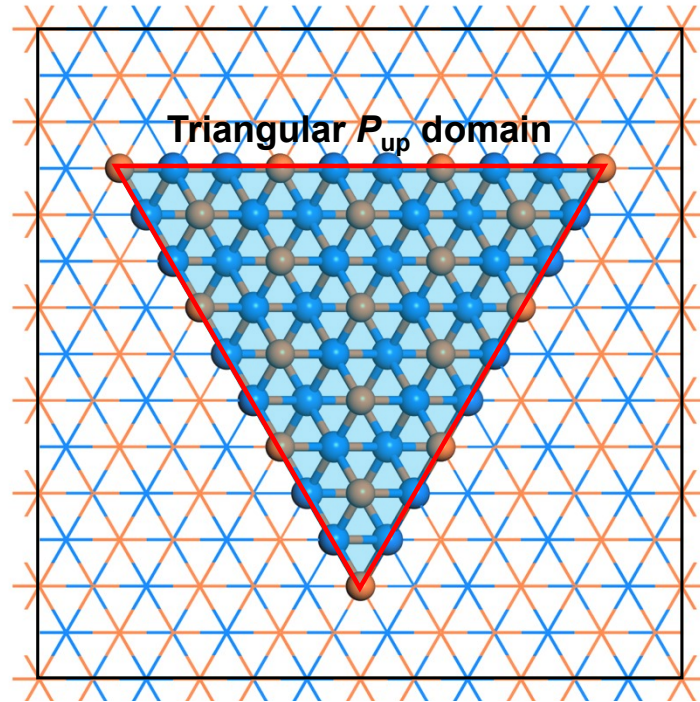

**Fig. S1** Top view of  $(4\sqrt{3} \times 7)$  supercell atomic model for calculating the formation energies of domain boundaries in  $\alpha$ - $\text{In}_2\text{Se}_3$  monolayer. Here a triangular domain in  $P_{\text{up}}$  state is embedded in a monolayer  $\alpha$ - $\text{In}_2\text{Se}_3$  in  $P_{\text{down}}$  state. The red lines correspond to the domain boundaries. The size of the  $P_{\text{up}}$  domain is tuned by changing the length of domain boundaries. The blue and orange balls represent In and Se atoms, respectively.

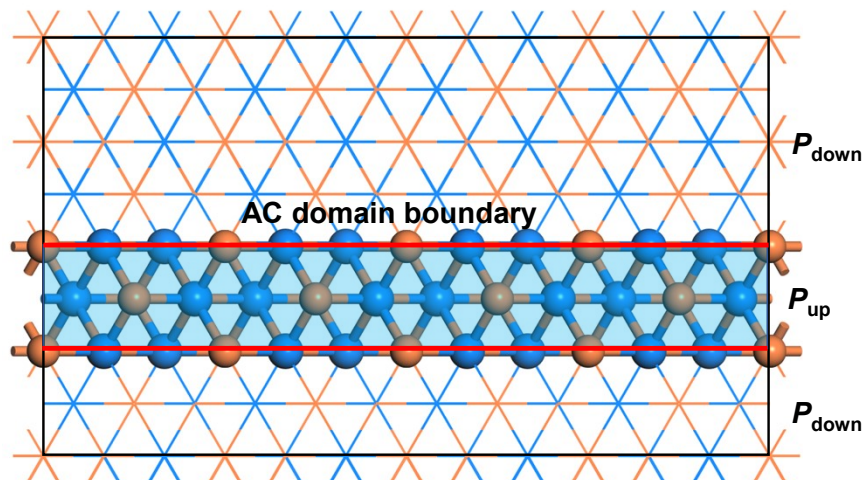

**Fig. S2** Top view of  $(4\sqrt{3} \times 4)$  supercell model for investigating the boundary propagation during the domain expansion of  $\alpha$ - $\text{In}_2\text{Se}_3$  monolayer. The red lines correspond to the AC domain boundaries.

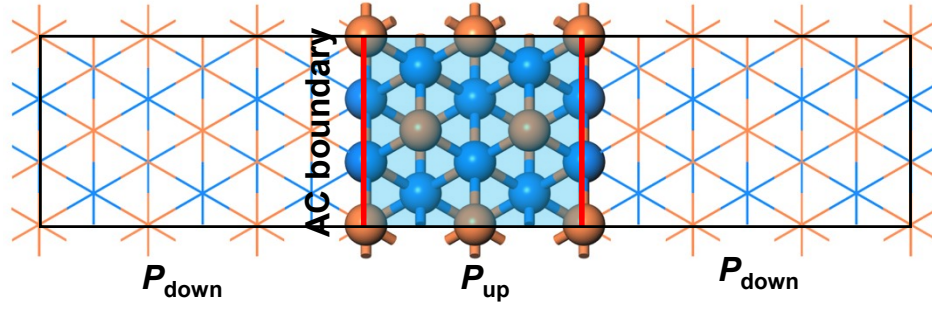

**Fig. S3** Top view of  $(\sqrt{3} \times 8)$  supercell model for calculating electronic structures of monolayer  $\alpha$ - $\text{In}_2\text{Se}_3$  with different domain textures. The different domain textures can be obtained by expanding the domain area in  $P_{\text{up}}$  state.

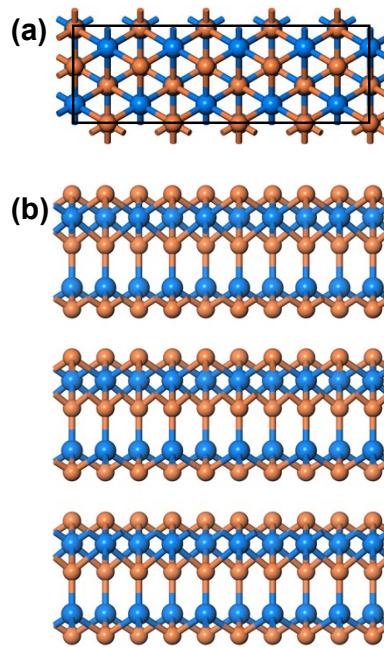

**Fig. S4** (a) Top and (b) side views of supercell atomic model of a trilayer  $\alpha$ - $\text{In}_2\text{Se}_3$ . The black frame denotes the range of unit cell. The blue and orange balls denote In and Se atoms, respectively.

## S2. Identification of Coulomb interactions between the $P_{\text{up}}$ and $P_{\text{down}}$ domains

Fig. S5 indicates the relative energy ( $\Delta E$ ) of monolayer  $\alpha\text{-In}_2\text{Se}_3$  domain textures with AC boundaries (see Fig. S3) as a function of switching domain ratio ( $R_{\text{up}}$ ). It can be clearly seen that the formation of a  $P_{\text{up}}$  domain in the  $P_{\text{down}}$ -state  $\alpha\text{-In}_2\text{Se}_3$  monolayer induces a fast energy increase ( $\sim 1.51$  eV) due to the introduction of domain boundaries. However, there are few energy changes ( $< 0.1$  eV) in the monolayer  $\alpha\text{-In}_2\text{Se}_3$  with the increase of  $R_{\text{up}}$ , suggesting that the expansion of domain boundaries does not bring the change of system energy. Therefore, the domain switching induced energy increment in monolayer  $\alpha\text{-In}_2\text{Se}_3$  mainly arises from the contribution of boundary formation energies, while the Coulomb interactions between the  $P_{\text{up}}$  and  $P_{\text{down}}$  domains barely contribute to the increase of system energy.

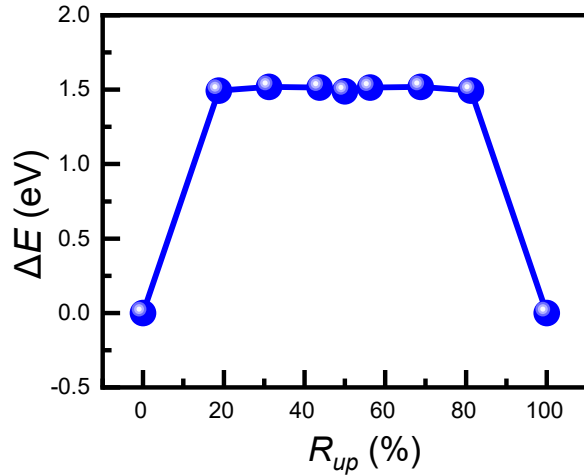

**Fig. S5** The relative energy ( $\Delta E$ ) of monolayer  $\alpha\text{-In}_2\text{Se}_3$  domain textures as a function of switching domain ratio ( $R_{\text{up}}$ ). The pristine  $\alpha\text{-In}_2\text{Se}_3$  monolayer in  $P_{\text{down}}$  state is used as the energy reference.

### S3. The determination of formation energies of domain boundaries.

For a given triangular domain (Fig. S6a), its formation energy  $E_f$  is from the contribution of three vertices ( $\gamma_v$ ) and three boundaries ( $\gamma_b$ ) as follows,

$$E_f = 3\gamma_v + 3l\gamma_b = E_{domain} - E_{ref} \quad (1)$$

where  $E_{domain}$  and  $E_{ref}$  are the total energy of the monolayer  $\alpha$ -In<sub>2</sub>Se<sub>3</sub> with and without a switching triangular domain, respectively. Thus, the calculation of  $\gamma_b$  is transformed into a problem of eliminating the effect of the vertexes, which can be done by taking the energy difference between similar triangle models with different side lengths. As shown in Fig. S6a, by shrinking the length from  $l_1$  to  $l_2$ , one has

$$\gamma_b = (E_f(l_1) - E_f(l_2)) / 3(l_1 - l_2) \quad (2)$$

Based on the calculated  $\gamma_b$ ,  $\gamma_v$  can be obtained by eq. (1). Hence, the formation energy of triangular domain with arbitrary boundary length ( $l$ ) can be determined. Fig. S6b shows the  $E_f$  of triangular domains with AC boundaries as a function of boundary length ( $l$ ). The formation energy of triangular domains indicates a linear increase with increasing domain size.

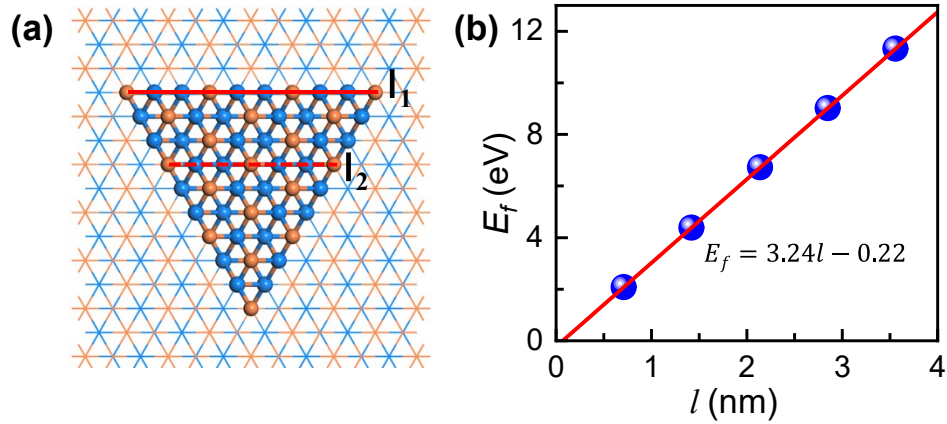

**Fig. S6** The formation energies of domain boundaries in  $\alpha$ -In<sub>2</sub>Se<sub>3</sub> monolayer. (a) The calculated model for determining the boundary formation energies. The model is composed of a triangular  $P_{up}$  domain embedded in  $\alpha$ -In<sub>2</sub>Se<sub>3</sub> monolayer in  $P_{down}$  state. (b) The formation energy ( $E_f$ ) of triangular domains with AC boundaries as a function of boundary length ( $l$ ).



**S4. Schematic of domain boundary propagation.**

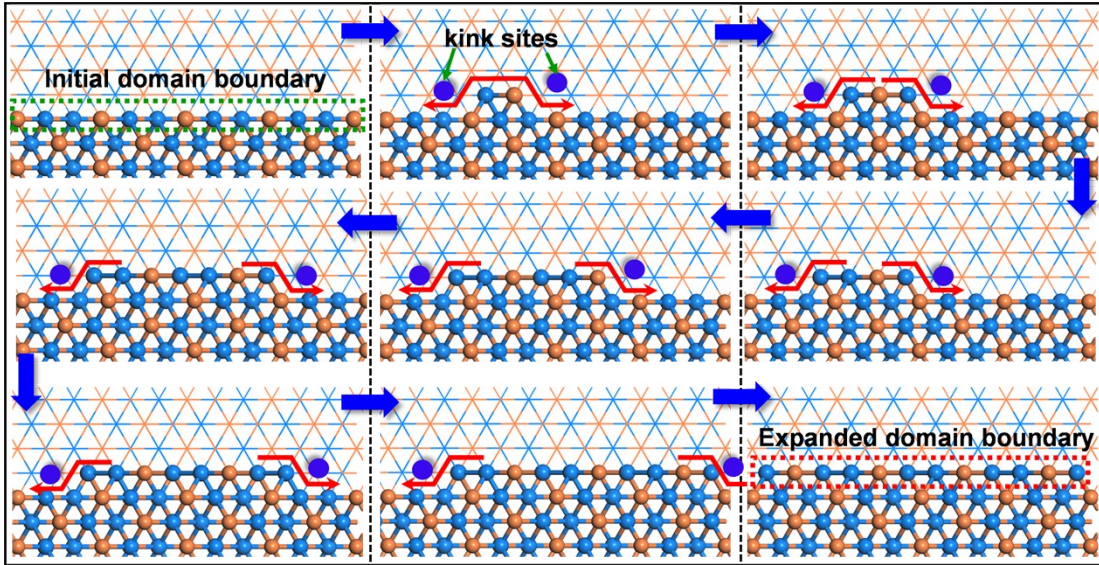

**Fig. S7** Structural models of domain boundary expansion at a repeated cycle of polarization switching from  $P_{\text{down}}$  to  $P_{\text{up}}$  state in  $\alpha\text{-In}_2\text{Se}_3$  monolayer. The arrows indicate the domain boundary propagation pathway. In a sharp boundary between the  $P_{\text{down}}$  to  $P_{\text{up}}$  domains, the production of a new boundary step will lead to two kink sites followed by a repeatable cycle of boundary propagation.

**S5. Schematic of polarization reversal in  $\alpha\text{-In}_2\text{Se}_3$  monolayer.**

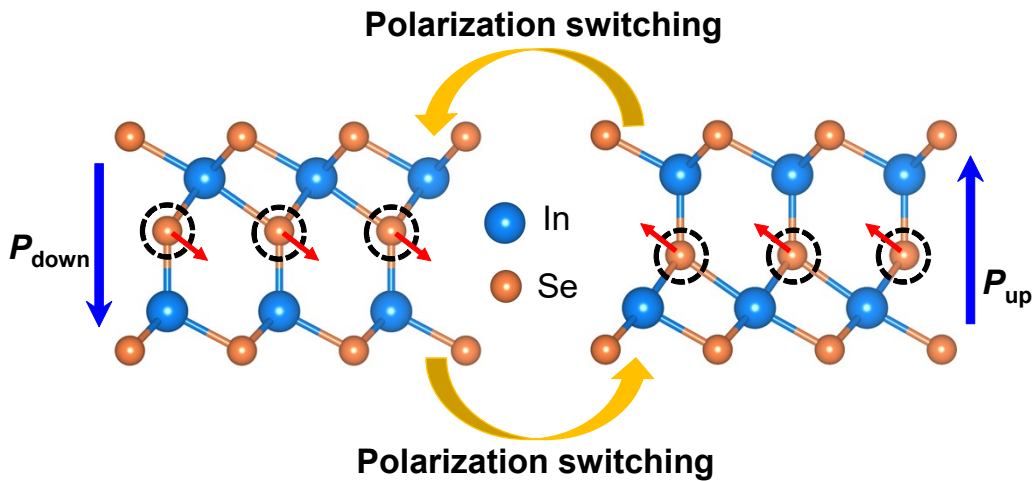

**Fig. S8** Schematic polarization reversal of  $\alpha\text{-In}_2\text{Se}_3$  monolayer via the atomic movement. The arrows indicate the polarization direction.

## S6. Electronic parameters in different $\alpha$ - $\text{In}_2\text{Se}_3$ domain textures.

**Table S1** The dipole moments ( $\mu$ ), electrostatic potential difference ( $\Delta V$ ), band gap ( $E_g$ ), and work function ( $W_F$ ) of the  $\alpha$ - $\text{In}_2\text{Se}_3$  monolayer at different  $R_{up}$  values.

| $R_{up}$ (%) | $\mu$ (Debye) | $\Delta V$ (eV) | $E_g$ (eV) | $W_F$ (eV) |
|--------------|---------------|-----------------|------------|------------|
| 0            | 8.13          | 1.39            | 1.43       | 6.62       |
| 18.75        | 5.33          | 0.92            | 1.62       | 6.41       |
| 31.25        | 3.21          | 0.58            | 1.73       | 6.31       |
| 43.75        | 1.05          | 0.18            | 1.83       | 6.18       |
| 50           | 0.02          | 0               | 1.85       | 6.10       |
| 56.25        | -1.05         | 0.18            | 1.83       | 6.18       |
| 68.75        | -3.21         | 0.58            | 1.73       | 6.31       |
| 81.25        | -5.33         | 0.92            | 1.62       | 6.41       |
| 100          | -8.13         | 1.39            | 1.43       | 6.62       |

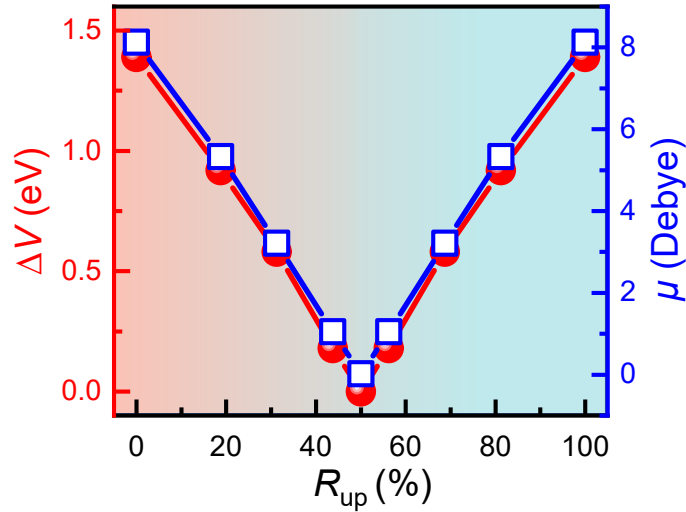

**Fig. S9** The electrostatic potential difference  $\Delta V$  (circles) and electric dipole moment  $\mu$  (rectangles) of monolayer  $\text{In}_2\text{Se}_3$  as a function of domain switching ratio ( $R_{up}$ ).

## S7. Domain-structure geometrics and stability of multilayer $\alpha$ -In<sub>2</sub>Se<sub>3</sub>.

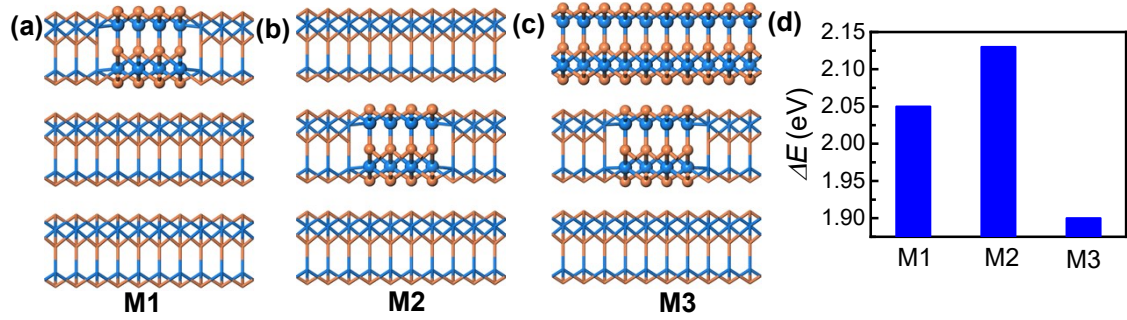

**Fig. S10** Structural models and relative energy of trilayer  $\alpha$ -In<sub>2</sub>Se<sub>3</sub> with three different domain textures. (a) Trilayer  $\alpha$ -In<sub>2</sub>Se<sub>3</sub> with a  $P_{\text{up}}$  domain at the top layer (labeled by M1), (b) trilayer  $\alpha$ -In<sub>2</sub>Se<sub>3</sub> with a  $P_{\text{up}}$  domain at the center layer (labeled by M2), (c) The formation of a  $P_{\text{up}}$  domain near the  $P_{\text{up}}$  layer in trilayer  $\alpha$ -In<sub>2</sub>Se<sub>3</sub> (labeled by M3). (d) The relative energy ( $\Delta E$ ) of three domain textures (M1, M2, and M3). For M1 and M2, the relative energy is calculated by the energy difference between the domain texture and trilayer  $\alpha$ -In<sub>2</sub>Se<sub>3</sub> in  $P_{\text{down}}$  state. The relative energy of M3 is the energy difference between the M3 and trilayer  $\alpha$ -In<sub>2</sub>Se<sub>3</sub> with a top  $P_{\text{up}}$  layer.
